1  
2  
3  
4  
5  
6  
7  
8  
9  
10  
11  
12  
13  
14  
15  
16  
17  
18  
19  
20  
21  
22  
23  
24  
25  
26  
27  
28  
29  
30  
31  
32  
33  
34  
35

## Genome assembly and transcriptome analysis provide insights into the anti-schistosome mechanism of *Microtus fortis*

Hong Li<sup>1, #</sup>, Zhen Wang<sup>1, #</sup>, Shumei Chai<sup>2</sup>, Xiong Bai<sup>3</sup>, Guohui Ding<sup>1,4</sup>, Junyi Li<sup>5</sup>, Qingyu Xiao<sup>1</sup>, Benpeng Miao<sup>1</sup>, Weili Lin<sup>1</sup>, Jie Feng<sup>3</sup>, Cheng Gao<sup>3</sup>, Yuanyuan Li<sup>4</sup>, Bin Li<sup>6</sup>, Wei Hu<sup>7</sup>, Jiaojiao Lin<sup>2</sup>, Zhiqiang Fu<sup>2, \*</sup>, Jianyuan Xie<sup>3, \*</sup>, Yixue Li<sup>1, 4, \*</sup>

1. Bio-Med Big Data Center, CAS Key Laboratory of Computational Biology, CAS-MPG Partner Institute for Computational Biology, Shanghai Institute of Nutrition and Health, University of Chinese Academy of Sciences, Chinese Academy of Sciences, Shanghai 200031, China

2. Shanghai Veterinary Research Institute, Chinese Academy of Agricultural Sciences, Key Laboratory of Animal Parasitology, Ministry of Agriculture, Shanghai, China

3. Shanghai Laboratory Animal Research Center, Shanghai, China

4. Shanghai Center for Bioinformation Technology, Shanghai Academy of Science and Technology, Shanghai 201203, China

5. School of Computer Science and Technology, Harbin Institute of Technology (Shenzhen), Shenzhen, Guangdong 518055, China

6. Shanghai Institute of Immunology, Department of Immunology and Microbiology, Shanghai JiaoTong University School of Medicine, Shanghai 200025, China

7. State Key Laboratory of Genetic Engineering, Ministry of Education Key Laboratory of Contemporary Anthropology, Collaborative Innovation Center for Genetics and Development, School of Life Sciences, Fudan University, Shanghai 200438, China

**Correspondence:** fuzhiqiang@shvri.ac.cn (Z.F.), xiejianyun@slarc.org.cn (J.X.), yxli@sibs.ac.cn (Y.L.)

## ABSTRACT

*Microtus fortis* (*M. fortis*) so far is the only mammal host that exhibits intrinsic resistance against *Schistosoma japonicum* infection. However, the underlying molecular mechanisms of this intrinsic resistance are not yet known. Here we performed the first *de novo* genome assembly of *M. fortis*, comprehensive gene annotation and evolution analysis. Furthermore, we compared the recovery rate of schistosome, pathological change and liver transcriptome between non-permissive host *M. fortis* and susceptible host mouse at different time points after Schistosome infection. We reveal that Immune response of *M. fortis* and mouse is different in time

45 and type. *M. fortis* activates immune and inflammatory responses on the 10<sup>th</sup> days  
46 post infection, involving in multiple pathways, such as leukocyte extravasation,  
47 antibody activation (especially IgG3), Fc-gamma receptor mediated phagocytosis, and  
48 interferon signaling cascade. The strong immune responses of *M. fortis* in early stages  
49 of infection play important roles in preventing the development of schistosome. On  
50 the contrary, intense immune response occurred in mouse in late stages of infection  
51 (28~42 days post infection), and cannot eliminate schistosome. Infected mouse suffers  
52 severe pathological injury and continuous decrease of important functions such as cell  
53 cycle and lipid metabolism. Our findings offer new insights to the intrinsic resistance  
54 mechanism of *M. fortis* against schistosome infection. The genome sequence also  
55 provides bases for future studies of other important traits in *M. fortis*.

56

## 57 **Keywords**

58 genome assembly, *Microtus fortis*, schistosome, immune, transcriptome

59

## 60 **Background**

61 Schistosomiasis is one of the most serious parasitic disease caused by blood flukes  
62 of the genus schistosoma. WHO estimates that at least 220.8 million people required  
63 preventive treatment for schistosomiasis in 2017 [1], thus schistosomiasis has a  
64 serious impact on health and economy [2]. Recent genome studies obtained the draft  
65 genomes of *S. japonicum*, *S. mansoni* and *S. haematobium*, providing insights into the  
66 complex mechanism of host-parasite interaction [3-6]. *Schistosoma* shares more  
67 orthologs with mammal hosts than those they share with ecdysozoans, which enables  
68 it to exploit the host's metabolism and signal pathways to complete growth and  
69 development [3].

70 It was reported that *S. japonicum* could native infect 46 mammal hosts [7].  
71 Schistosomes penetrate the skin of host, migrate through the heart and lung, and then  
72 develop in the liver. The development and survival of schistosomes were distinct  
73 among different hosts [7]. Around 40%~70% worms can complete their life cycle and  
74 cause severe pathological damage in susceptible hosts such as mouse, rabbit, cattle  
75 and goat. Only a small fraction of worms can survival in non-susceptible hosts such as  
76 rat and water buffalo (Supplementary Table 1). To our best knowledge, *M. fortis* is the  
77 only mammal in which schistosomes cannot get maturation [7]. The intrinsic resistance  
78 of *M. fortis* against schistosoma has been proved by multiple studies [8, 9], no matter  
79 *M. fortis* came from a schistosomiasis epidemic or a non-epidemic area [10].  
80 Additionally, our previous studies demonstrate that *M. fortis* is also resistant to *S.*  
81 *mansoni*. Therefore, *M. fortis* is a valuable animal model to study the mechanism of  
82 host-schistosoma interaction.

83 *M. fortis* (reed vole) is a member of the Rodentia: Cricetidae order. It distributes in  
84 China, Korea, NE Mongolia and parts of Russia. Besides intrinsic resistance against  
85 schistosome, *M. Fortis* has potential to be animal models of human diseases, such as  
86 nonalcoholic fatty liver, diabetes and ovarian cancer [11, 12]. Due to the lack of

87 genome sequence of *M. fortis*, many experiments had to use similar sequences from  
88 the close organism. For instance, mRNA microarray experiments used mouse  
89 microarray platform [13], and miRNA microarray studies were comprised of miRNAs in  
90 mouse, rat, and Chinese hamster [14]. Although these studies found some differential  
91 expressed genes, the results can not exactly present the molecular characteristics of  
92 *M. fortis*. A reference genome of *M. fortis* is in urgent need.

93 Previous studies have found several proteins that may be associated with the  
94 intrinsic resistance of *M. fortis* to *S. japonicum*. Heat shock protein 90 $\alpha$  of *M. fortis*  
95 (*Mf*-HSP90 $\alpha$ ) caused 27.0% schistosomula death rate in vitro, and mice injected with  
96 *Mf*-HSP90 $\alpha$  recombinant retrovirus reduced 40.8% worm burden [15]. Similar studies  
97 showed that mice injected with *Mf*-KPNA2 and *Mf*-albumin had 39.42% and 43.5%  
98 worm burden reduction, respectively [16, 17]. Another work reported that purified  
99 IgG3 antibody from laboratory-bred *M. fortis* and wild *M. fortis* could more effectively  
100 kill schistosomula than the IgG3 from Kunming mice [18]. Additionally, cytokines and  
101 chemokines levels in the sera of *M. fortis* are assessed to study the immune response  
102 changes. Expression of IL-4, IL-5 and IL-10 are increased from the second to the third  
103 week post-infection, indicating Th2 biased immune response is important for  
104 schistosoma clearance [19, 20]. Upregulation of IL-12 and interferon gamma (IFN $\gamma$ )  
105 demonstrate the roles of Th1 immune response in *M. fortis* [19, 20]. However, most of  
106 these results have not been confirmed or been further investigated by other  
107 researchers. Investigation of one or several genes is insufficient to understand the  
108 complex interaction between schistosoma and *M. fortis*. In recent years, new  
109 technologies such as next generation sequencing are used to directly measure the  
110 molecular profiles of *M. fortis*. A study based on *de novo* transcriptome sequencing  
111 shows that innate and adaptive immune responses may play an important role in the  
112 intrinsic resistance against schistosome [21]. Another study used liquid  
113 chromatography-mass spectrometry to find some differential metabolites between  
114 infected *M. fortis* and C57BL/6 mice [19]. However, these large-scale studies cannot  
115 accurately locate the resistance genes due to lack of *M. fortis* genome. More studies  
116 are necessary to explore the mechanism of *M. fortis* intrinsic resistance.

117 Here we generate the draft genome of *M. fortis*, and annotate its genomic features  
118 comprehensively. The comparative transcriptome analysis reveals that non-permissive  
119 host *M. fortis* and susceptible host mouse are different in time and type of immune  
120 response. We propose key genes and pathways of immune response which serve as a  
121 basis for future experimental studies.

122

## 123 Results

### 124 Recovery rate of schistosomula from *M. fortis*

125 Although several studies have confirmed the intrinsic resistance of *M. fortis* to *S.*  
126 *japonicum* [7-9], the process of elimination of worms in their bodies is unclear.  
127 Therefore, we infected *M. fortis* and BALB/c mice with *Schistosoma japonicum*  
128 cercariae, and calculated the percentage of worms that were recovered by perfusion  
129 and culturing from different tissues of the infected animals. As shown in Figure 1A-B,

130 the percentage of recovered worms (recovery rate) is significantly lower in infected *M.*  
131 *fortis* than that in infected mice. Total recovery rates of *M. fortis* are 15.04%, 7.05%,  
132 9.47% and 0.77% on the 1st, 3rd, 7th and 14th days post infection (DPI) respectively,  
133 while those of BALB/c mice are 39.24%, 38.56%, 46.17%, 43.00%. The results indicate  
134 that schistosomula is extinct gradually in *M. fortis* in the early stages of infection (1-14  
135 days). After infection for longer time (21<sup>st</sup>, 28<sup>th</sup> and 42<sup>nd</sup> DPI), schistosomula disappears  
136 in *M. fortis*, but there are still around 60% worms could be recovered from  
137 hepatic portal vein in BALB/c mice.

138

### 139 **Histopathological changes in the lungs and livers of *M. fortis* infected with *S.*** 140 ***japonicum***

141 Some hemorrhagic spots were observed on the lung surface of *M. fortis* on the 3<sup>rd</sup>  
142 and 7<sup>th</sup> DPI, and the lung of BALB/c did not have similar damage (Figure 1C,  
143 Supplementary Figure1). Histopathological observation showed that the worms were  
144 found in the lung tissue of the *M. fortis* on the 3<sup>rd</sup> and 7<sup>th</sup> DPI, with large bleeding  
145 around them, and inflammatory cells infiltrating such as neutrophils and lymphocytes.  
146 There were similar pathological phenomena in the lungs of mice, but to a lesser extent.

147 Some white nodules which contained the remnants of schistosomula appeared on  
148 the liver of *M. fortis* beginning on the 7<sup>th</sup> DPI, and most of them disappeared on the  
149 14<sup>th</sup> DPI (Figure 1D). The appearance of the liver of infected *M. fortis* returned to  
150 normal on the 21<sup>st</sup> DPI. Histopathological observation showed that most of the  
151 remaining worms in nodules were in the small vessels, surrounded by inflammatory  
152 cell infiltration. There was no obvious pathological change in the liver of mice during  
153 the same period, although some schistosomula were *observed* in the liver slices. These  
154 histopathological changes were consistent with previous studies [22].

155

### 156 **Genome assembly and annotation**

157 Genomic DNA of an 8-week-old female *M. fortis* from Dongting Lake, Hunan, China  
158 was subjected to shotgun sequencing (Table1, Supplementary Table 2). The  
159 sequencing depth was more than 110 X. Sequence reads were assembled by using  
160 ALLPATHS-LG into scaffolds. The final genome assembly was 2.2 Gb in length, which  
161 was about 92% of the estimated genome (Supplementary Figure 3, Supplementary  
162 Table 3). The contig N50 (the shortest length of sequence contributing more than half  
163 of assembled sequences) was 60.7 kb and the scaffold N50 was 10.1 Mb (Table1,  
164 Supplementary Table 4). The GC content was 42.4%, which was similar to that mammal  
165 genomes (Supplementary Figure 4, Supplementary Table 5). Assembly quality was  
166 assessed by CEGMA; a total of 238 core eukaryotic genes (96%) out of 248 were found  
167 in the assembly (Supplementary Table 6). Additionally, 116,254 transcriptional  
168 fragments (>200 bp) were identified by *de novo* RNA-Seq assembly and over 98% of  
169 them were covered by the assembled scaffolds (Supplementary Table 7).

170 The genome was analyzed for repeats and low complexity DNA sequences using  
171 RepeatMasker. The content of repetitive elements was 30.2%. It is lower than those  
172 reported for most mammalian genomes, but higher than that from another sequenced  
173 species *M. ochrogaster* (Prairie vole) in the *Microtus* genus (Supplementary Figure 5,

174 Supplementary Table 8). The SINE, LINE and LTR repeats of *M. fortis* represent similar  
175 percentage (around 9%). The *M. fortis* and prairie vole genomes have about 35% fewer  
176 LINE-1 (387,111 and 386,270) than those the mouse and human genomes (617,477  
177 and 579,553) have, suggesting that the LINE-1 repeat specifically decreased in the  
178 *Microtus* genus.

179 We identified 21,867 protein-coding genes by combining *de novo* prediction,  
180 homology-based prediction, and transcriptome-aided annotation (Supplementary  
181 Figure 6-8, Supplementary Table 9-11). Among protein-coding genes, 13,159 (60%)  
182 were identified from RNA-Seq data; 16,990 (78%) had homologs in other species;  
183 21,128 (96.6%) genes could be annotated to protein families, KEGG pathways or  
184 Gene Ontology terms. We also identified 2,462 non-coding genes, including 670  
185 miRNA, 515 tRNA, 167 rRNA, 147 lncRNA and 963 snRNA. The number and annotation  
186 of predicted genes are comparable to those of well-studied mammalian genomes.

187

### 188 Evolution of gene families

189 In order to examine the genotypes underlying the adaptations of *M. fortis*, we  
190 constructed orthologous gene families, analyzed the expansion or contraction of gene  
191 families, and detected positively selected genes. We identified 23,575 single-copy  
192 orthologous families by using 18 mammalian genomes (Supplementary Table 12).  
193 There existed 19,070 orthologous families in four genomes (human, mouse, *M. fortis*  
194 and *M. ochrogaster*), 14,327 (75%) of which were shared by all, 448 were specific to  
195 the *M. fortis* genome (Figure 2A). We constructed a phylogenetic tree by analyzing the  
196 orthologous gene families (Figure 2B). *M. fortis* sat within rodents, and was the closest  
197 to *M. ochrogaster*. The divergence time between *M. fortis* and *M. ochrogaster* was 8.6  
198 (95% CI: 4.2-15.5) million years ago. The ancestors of *Microtus* genus split from the  
199 ancestor of rats and mice approximately 46.3 (95% CI: 29.3-63.9) million years ago.

200 Compared to other mammals, *M. fortis* had 89 expanded and 102 contracted gene  
201 families. A large fraction of the contracted families involved olfactory receptors and  
202 taste receptors, which might be due to the limited food type of herbivore. We  
203 identified 532 positively selected genes (PSGs, Figure 2C) by employing the likelihood  
204 ratio test on the dN/dS ratio (ratio of the rate of nonsynonymous substitutions to the  
205 rate of synonymous substitutions). Functional enrichment analysis of 532 PSGs  
206 revealed rapidly evolving biological processes, such as regulation of cell shape  
207 (P=0.003) and innate immune response (P=0.004). A total of 33 innate immune genes  
208 were positively selected, which indicates the rapid evolution of immune system in *M.*  
209 *fortis* (Supplementary Table 13). For the previously reported genes (ALB[17], HSP90 $\alpha$   
210 [15], KPNA2[16]) that were possibly associated with *M. fortis* intrinsic resistance, we  
211 did not find any significant sites under positive selection.

212 We annotated the immunoglobulin (IG) and T cell receptor (TR) genes by aligning  
213 IMGT [23] reference sequences of human, mouse, rat and rabbit to the genome. For  
214 IG genes, we identified 122 (92) IGHVs, 146 (104) IGKVs and 33 (20) IGLVs (parentheses  
215 show sequences without stop codon) (Supplementary Table 14). For TR genes, we  
216 identified 92 (80) TRVAs/TRVDs, 34 (30) TRVBs and 6 (5) TRVDs. The TR loci were  
217 almost complete, with most V- and C-genes distributed in 4 scaffolds (Supplementary



218 Table 15). Although the IG loci were more fragmented, our phylogenetic analysis of  
219 the IGV sequences suggested that they covered typical clan of other species such as  
220 human and mouse (Supplementary Figure 9). The IG and TR repertoire in the *M. fortis*  
221 genome provided valuable resources for screening specific immune molecules against  
222 *Schistosoma*.

223 Major histocompatibility complex (MHC) is a set of genes that are essential for  
224 immune system to recognize foreign molecule. We searched the Class I and II  
225 histocompatibility antigen domains across *M. fortis* genome. There were 27 genes with  
226 Class I histocompatibility antigen domains and 20 genes with Class II histocompatibility  
227 antigen domains (Supplementary Table 16). These genes were located on 11 scaffolds  
228 (>100kb). Seven scaffolds can be mapped to the MHC regions of mouse and human.  
229 (Supplementary Figure 10).

230

### 231 **Transcriptome characterization after *S. japonicum* infection**

232 Since liver is the major organ where schistosome migrates, matures and dies, RNA-  
233 sequencing was performed to measure the liver transcriptome of *M. fortis* and mice  
234 before infection (0d) and at several time points related to key pathological changes  
235 (Supplementary Figure 11, Supplementary Table 17). We used “false discover rate (FDR)  
236 < 0.05 and the absolute value of fold change > 2” as threshold to select differentially  
237 expressed genes (DEGs) at different time points after *S. japonicum* infection.  
238 Compared to pre-infection (0d), 2,845 genes of *M. fortis* and 5,185 genes of mouse  
239 were differentially expressed at least one time point after infection (Supplementary  
240 Figure 12). *M. fortis*'s transcriptome changed mostly on the 14<sup>th</sup> DPI, while mouse's  
241 transcriptome changed mostly on the 28<sup>th</sup> and 42<sup>nd</sup> DPI. Generally, mouse had more  
242 DEGs than *M. fortis* had at the same time point, which is consistent with more severe  
243 pathological changes of mouse. For both species, a large number of DEGs overlapped  
244 at different time points after infection.

245 To investigate the dynamic expression pattern in time-series data, DEGs of *M. fortis*  
246 and mouse were divided into five and six subgroups based on hierarchical clustering  
247 (Figure 3AB, Supplementary Figure 14). Expression of genes in subgroup MF\_C3  
248 increased on the 7<sup>th</sup> and 10<sup>th</sup> DPI, then decreased on the 14<sup>th</sup> DPI. Expression of genes  
249 in MM\_C6 were stable until a significant increase on the 28<sup>th</sup> and 42<sup>nd</sup> DPI. Genes in  
250 these two clusters were especially interesting, since they are enriched in immune,  
251 inflammatory, defense response, cell adhesion and so on. Subgroup MM\_C1 and  
252 MM\_C3 represented the down-regulated genes on the 10<sup>th</sup> DPI and 14<sup>th</sup> DPI in mouse,  
253 which majorly participated in cell cycle, mitochondrion, lipid metabolism and some  
254 metabolic processes. MF\_C1 was the largest subgroup of *M. fortis*, represent the up-  
255 regulated genes on the 14<sup>th</sup> and 21<sup>st</sup> DPI. However, there were no significant enriched  
256 functional terms in this subgroup.

257 Comparative transcriptome analysis was used to explore the common and unique  
258 characterization of *M. fortis* and mice. Firstly, we compared DEGs between *M. fortis*  
259 and mouse at each paired time points. DEGs were obtained by comparing the  
260 expression profiles of post-infection with pre-infection (FDR<0.05). Correlation  
261 coefficients were calculated using the fold change of differentially expressed orthologs.  
262 The correlations between *M. fortis* and mouse were low at the same time point (Figure

263 3C), which indicated distinctive expression response to *S. japonicum* infection. Taken  
264 10<sup>th</sup> DPI as an example, 70% DEGs of *M. fortis* did not have significant expression  
265 change at mouse, and 92% DEGs at mouse were not differential at *M. fortis* (Figure 3D,  
266 Supplementary Table 18). Only 47 (100) genes were simultaneously up- (down-)  
267 regulated in both species on the 10<sup>th</sup> DPI. The highest correlation occurred on the 10<sup>th</sup>  
268 DPI of *M. fortis* and the 28<sup>th</sup> DPI of mouse. 40% of the up-regulated genes on the 10<sup>th</sup>  
269 DPI in *M. fortis* also increased significantly on the 28<sup>th</sup> DPI in mouse (Figure 3D).

270 Secondly, we compared the annotated functions of DEGs in *M. fortis* and mouse by  
271 Gene Set Enrichment Analysis. Figure 3E illustrated the significantly differential  
272 biological progress at different time points post-infection compare to pre-infection  
273 (Supplementary Figure 13). The enrichment of DEGs in *M. fortis* was majorly on the  
274 10<sup>th</sup> DPI, while DEGs in mouse enriched in more biological process terms on the 28<sup>th</sup>  
275 DPI and 42<sup>th</sup> DPI. Most of the significantly changed functions on the 10<sup>th</sup> DPI of *M.*  
276 *fortis* were also enriched on the 28<sup>th</sup> and 42<sup>th</sup> DPI of mouse. The shared terms were  
277 majorly immune-related processes, such as immune system response, response to  
278 external stimulus and inflammatory response (Figure 3E, Supplementary Figure 13).  
279 These results demonstrated that intense immune responses of *M. fortis* occurred on  
280 the 10<sup>th</sup> DPI. Although mouse had mild immune response after *S. japonicum* infection  
281 [24], more intense immune responses occurred at the 28<sup>th</sup> and 42<sup>th</sup> DPI in mouse.

282

### 283 **Distinct immunity mechanism of *M. fortis* and mouse**

284 The above results showed that the 10<sup>th</sup> day after infection is especially important to  
285 understand the differential immune response of *M. fortis* and mouse against *S.*  
286 *japonicum* infection. Therefore, we analyzed the annotated functions of 395 specially  
287 up-regulated genes on the 10<sup>th</sup> DPI of *M. fortis*. Most of the enriched pathways were  
288 related with innate immunity. The top 3 pathways were leukocyte extravasation  
289 signaling, integrin signaling, and Fc-gamma receptor mediated phagocytosis in  
290 macrophages and monocytes (Figure 4A). ICAM1 (CD54) and VCAM1 (CD106) are  
291 important cell adhesion molecules in leukocyte extravasation signaling (Figure 4B).  
292 Their up-regulation may promote leukocytes migrate from the blood vessel to liver to  
293 eliminating schistosomulum. Expression of FCGR1 (CD64) increased on the 10<sup>th</sup> DPI in  
294 *M. fortis* (Figure 4C). FCGR1 is the high-affinity receptor for IgG. It involved in  
295 phagocytosis and regulation of cytokine production. We further analyzed the  
296 expression pattern of immunoglobulin isotypes. IgG1, IgG3, IgA and IgM were partially  
297 up-regulated in *M. fortis* on the 7<sup>th</sup> and 10<sup>th</sup> DPI, significantly up-regulated on the 14<sup>th</sup>  
298 and 21<sup>th</sup> DPI (Figure 4D). On the contrary, expression of IgG1, IgA and IgM increased  
299 significantly in mice on the 28<sup>th</sup> and 42<sup>th</sup> DPI (Figure 4D). IgG3 is the most interesting  
300 antibody, since it was significantly up-regulated in infected *M. fortis*, but it almost did  
301 not increase in infected mouse except several outlier data points (Figure 4E). This  
302 result supports a previous study that IgG3 antibody purified from *M. fortis* could more  
303 effectively killed schistosomula than that of mouse [18].

304 Furthermore, we used Ingenuity Pathways Analysis (IPA) to identify the potential  
305 upstream regulators on the 10<sup>th</sup> DPI, which may explain the expression change of other  
306 genes. To remove false positive regulators, we only kept regulators which were  
307 differentially expressed at the corresponding time points. We supposed that the

308 species-specific regulators or regulators with opposite expression change in two  
309 species were more important. In the end, we obtained 34 *M. fortis* specific regulators  
310 and 65 mouse specific regulators (Figure 4F). IRF7 was the top significant regulator in  
311 *M. fortis* on the 10<sup>th</sup> DPI (P=9.03E-11). Further analysis of regulators on the 7<sup>th</sup> DPI also  
312 revealed that IRF7 ranked the first in *M. fortis* (P=3.27E-8). IRF7 encodes interferon  
313 regulatory factor 7, is the major transcription factor that regulate type I interferon [25].  
314 The expression of IRF7 significantly increased in *M. fortis* on the 7<sup>th</sup> and 10<sup>th</sup> DPI, and  
315 then decreased (Figure 4G). However, IRF7's expression unchanged in mice in the first  
316 10 days and then increased since the 28<sup>th</sup> days post-infection (Figure 4G). To confirm  
317 the functional effect of IRF7 up-regulation, we analyzed interferon stimulated genes  
318 (ISG) whose expression are induced by interferon [26, 27]. As expected, expression  
319 pattern of ISGs were consistent with the expression pattern of IRF7 in both *M. fortis*  
320 and mouse (Figure 4H). We also observed the activation of JAK-STAT signaling pathway  
321 and up-regulated of some cytokines. Therefore, IRF7 was an important factor that  
322 activated the interferon signaling in *M. fortis* on the 7<sup>th</sup> or 10<sup>th</sup> DPI.

323 We used the same methods to analyze the mouse transcriptome on the 28<sup>th</sup> DPI.  
324 Th1 and Th2 activation pathway was rank first in the IPA pathway analysis. The top two  
325 regulators were IFNG and TNF. Both genes are critical inflammatory cytokines of Th1  
326 cells. Their expression values were significantly upregulated in mouse on the 28<sup>th</sup> DPI,  
327 suggesting the activation of Th1 immune response (Figure 5A). This observation is  
328 consistent with the previous report that Th1 is the dominant immunity in the first 3–5  
329 weeks in the mouse model of schistosome infection [24]. Although the immune  
330 response in mouse is strong since the 28<sup>th</sup> days post-infection, it cannot eliminate  
331 schistosoma. Earlier intense immune response of *M. fortis* prevents the development  
332 of schistosomulum.

333

### 334 ***S. japonicum* induced dysfunction in mouse**

335 Since schistosoma infection induces severe pathological changes, we are also  
336 interested in the dysfunction of mouse. Transcriptome analysis revealed significantly  
337 down regulation of cell cycle and lipid metabolism on the 10<sup>th</sup> days post infection. The  
338 regulator analysis showed that FOXO1 is the most significant gene that predicted to be  
339 common regulators of *M. fortis* and mouse (Figure 4F); Its expression decreased in *M.*  
340 *fortis* on the 7<sup>th</sup> and 10<sup>th</sup> DPI, while increased in mouse on the 7<sup>th</sup> and 10<sup>th</sup> DPI (Figure  
341 5B). FOXO1 belongs to the forkhead family of transcription factors. It plays important  
342 roles in glucose and lipid metabolism, cell cycle arrest, and inflammation [28, 29].  
343 Previous report showed that FOXO1 inhibited cyclin dependent kinases [30], therefore  
344 the over-presentation of down-regulated cell cycle genes in mouse may be the result  
345 of FOXO1's activation (Figure 5C).

346 Schistosoma cannot *de novo* synthesize fatty acids [31]. We noted that fatty acid  
347 biosynthesis in mouse significantly decreased on 10<sup>th</sup> day post schistosoma infection.  
348 Two key genes (FASN and ACACA) exhibited continuously decreasing  
349 expression pattern in schistosoma-infected mouse (Figure 5D,E), which is consistent  
350 with a previous report that major fatty acids and tricarboxylic acid cycle intermediates  
351 were significantly reduced in mice [32]. However, the expression of FASN and ACACA  
352 in *M. fortis* decreased on the and 10<sup>th</sup> DPI and then returned to the original levels.  
353 Distinct expression pattern of fatty acid synthesis indicated different host-parasite  
354 interaction.



## 355 **Methods**

### 356 **Population establishment**

357 *M. fortis* (*Microtus Fortis* calamorum Thomas) were captured in Dongting Lake  
358 region, Hunan Province by the Institute of Subtropical Agriculture (ISA), the Chinese  
359 Academy of Sciences in 1994 and were bred in laboratory.  
360 *M. fortis* were introduced to Shanghai SIPPR-BK  
361 Laboratory Animal Co., Ltd from ISA in 1998. Outbred *M. fortis* colony was  
362 established [33, 34] and the voles were purified by biological purification [35]. The  
363 study protocol was approved by the Animal Care and Use Committee of the Shanghai  
364 Laboratory Animal Research Center.

365

### 366 **Genome sequencing and assembly**

367 An 8-week-old female *M. fortis* was acquired after four generation inbreeding, and  
368 was subjected to genome sequencing. Genomic DNA was isolated from muscle, liver,  
369 lung and blood using Qiagen DNeasy kit according to the manufacturer's instructions.  
370 Seven different paired-end libraries were constructed with 250 bp, 500 bp, 2 kb, 5 kb,  
371 10 kb and 20 kb) insert sizes. The sequencing was done using Illumina HiSeq X Ten  
372 system in 2\*150bp paired-end mode. The raw data were filtered to trim reads with  
373 adaptor sequences and remove low-quality reads. The remained reads were used to  
374 complete the genome assembly using ALLPATHS-LG. In order to assess the assembly  
375 quality, we used CEGMA (core eukaryotic gene mapping method) to identify the core  
376 genes in the *Microtus fortis* genome assembly.

377

### 378 **Genome annotation**

379 RepeatMasker (v4.0.6) [36] was used to screen and annotate repetitive elements.  
380 Results from *de novo* repeat discovery by RepeatModeler (v1.0.8) [37] and  
381 homologous search against rodentia repeats in Repbase (v16.10) [38] were combined  
382 and masked. The repeat information of other genomes for comparison were fetched  
383 from RepeatMasker datasets online  
384 (<http://repeatmasker.org/genomicDatasets/RMGenomicDatasets.html>). Gene models  
385 were predicted by three approaches: 1) *de novo* prediction was performed on the  
386 repeat masked genome by five programs: AUGUSTUS (v3.0.1), GENEID (v1.4.4),  
387 GeneMark\_ES (v2.3e), GlimmerHMM (v3.0.2) and SNAP (v2013-11-29). 2) homology-  
388 based prediction by projecting protein sequences of other mammals from RefSeq to  
389 the new genome. Rough search was performed by genBlastA (v1.0.1) [39], with protein  
390 coverage greater than 30%. Precise projection aware of gene structure was then  
391 performed by GeneWise (v2.4.1) [40] for the targeted DNA sequences. 3)  
392 Transcriptome-aided annotation was done by mapping RNA-seq reads back to the  
393 assembled genome using Tophat and Cufflinks. In the end, genes obtained from all the  
394 three approached were merged by the EvidenceModeler algorithm using a weight  
395 combination (*de novo* predictions = 0.3, GeneWise = 5, transcriptome = 10). Those  
396 EVM predictions supported by only one *de novo* program were removed, and  
397 predictions with a coding score below 1024 or a coding/noncoding score ratio below  
398 2 are eliminated (supplementary Figure6). Pseudogenes were predicted by  
399 PseudoPipe which aligned the human proteins to *M. fortis's* genome and reported a  
400 set of good-quality pseudogene sequences based on a combination of criteria [41].

401 Four types of noncoding RNAs (microRNAs, transfer RNAs, ribosomal RNAs and small  
402 nuclear RNAs) were annotated using tRNAscan-SE (v1.3.1) and Rfam database (v11.0).  
403 InterProScan (v5.19) was used to screen proteins against multiple protein signature  
404 databases, such as Pfam and Prosite. The KASS server was used to assign genes to  
405 KEGG ortholog and pathway. Gene ontology (GO) terms of human genes and mouse  
406 genes were assigned to their orthologs in *M. fortis*.

407

### 408 **Gene family construction**

409 Gene families were constructed following the TreeFam pipeline [42], as described in  
410 Li et al.[43] . Protein sequences of other species were downloaded from RefSeq, and  
411 the longest isoform of each gene was preserved. Pairwise all-to-all blast were  
412 performed with e-value of 1e-10. Local alignments were joined by solar, and the total  
413 alignment length should cover at least 1/3 on both proteins. A h-score was calculated  
414 for each protein pair (p1, p2) based on the blast score: h-score = score (p1,  
415 p2)/max(score(p1, p1), score(p2, p2)). Homologous proteins were then clustered by  
416 hcluster\_sg with minimum edge weight of 5, minimum edge density of 1/3 and  
417 opossum as an outgroup. For each cluster, multiple alignment on protein sequences  
418 was done by clustalo (v1.2.0) [44], which was then translated back to CDS alignment  
419 by treebest backtrans. Guided by the common tree from NCBI Taxonomy, the  
420 phylogenetic tree for each cluster was constructed by treebest best. Orthologs were  
421 inferred from the cluster by treebest nj. Solar, hcluster\_sg and treebest were obtained  
422 from <https://sourceforge.net/p/treesoft/code/HEAD/tree/branches/lh3/>. Four-fold  
423 degeneration sites were extracted from the CDS alignment of single-copy orthologs,  
424 which were used to reconstruct the phylogenetic tree of species by MEGA (v7.0.18)  
425 [45]. The species tree was calibrated by MCMCtree in PAML (v4.9) [46], taking the  
426 divergence time (2.5% lower and upper bounds) of mouse-rat (11-47 Mya), mouse-  
427 human (67-124 Mya) and mouse-dog (65-150 Mya) from TimeTree [47]. Evolution of  
428 gene family size was inferred by CAFÉ (v3.1) [48] based on the homologous clusters.  
429 For families with significant size variations (family-wide p-value < 0.01), the branches  
430 with significant expansion and contraction were selected (Viterbi p-value < 0.01).

431

### 432 **Positively selected genes**

433 Based on the CDS alignment of single-copy orthologs, positively selected genes in  
434 *M. fortis* were identified by codeml in PAML (v4.9) [46]. Poorly aligned regions were  
435 filtered by Gblocks (0.91b) [49]. Taking *M. fortis* as foreground and six schistosome-  
436 susceptible hosts (human, dog, cattle, mouse, rabbit, golden hamster) as background,  
437 the branch-site model (model = 2, NSsite = 2) with dN/dS ≤ 1 (fix\_omega = 1, omega =  
438 1) and dN/dS > 1 (fix\_omega = 0) were adopted, respectively. The genes with  
439 significant dN/dS > 1 were identified by the likelihood ratio test (P < 0.05, chi-square  
440 test), and the positively selected sites were identified by the Bayes Empirical Bayes  
441 analysis.

442

### 443 **Immunoglobulins and T cell receptors**

444 For the immunoglobulins (IG) and T cell receptors (TR), IMGT [23] reference  
445 sequences of germline V-, D-, J-, C-genes from the human, mouse, rat and rabbit were  
446 downloaded (release 201839-3). A rough alignment of amino acid sequences of V- and  
447 C-genes to the genome was performed with tblastn -e 1e-5. Redundant hits were

448 merged, and V-segments with length short than 200 bp were filtered. The targeted  
449 regions were extracted for precise alignment with Exonerate (v2.2.0) [50] --model  
450 protein2genome --percent 50. For the scaffolds that contain V- or C-genes, the D- and  
451 J-genes were further mapped with tblastn. The V-genes were also annotated with the  
452 best hit to human or mice by IgBlast (v1.10.0) [51]. Multiple alignment of V-genes was  
453 performed by ClustalW, and the neighbor-joining tree was constructed by MEGA7 with  
454 default parameters.

455

### 456 **Infection Experiment**

457 *S. japonicum* cercariae were harvested from positive *Oncomelania hupensis* snails  
458 maintained by Shanghai Veterinary Research Institute, Chinese Academy of  
459 Agricultural Sciences (Shanghai, China). BALB/c mice (male, 6 weeks old) and *Microtus*  
460 *fortis* (male, 6 weeks old) were provided by Shanghai SIPPR-BK Laboratory Animal Co.,  
461 Ltd. Animal experiments were performed according to the protocols approved by the  
462 Animal Care and Use Committee of the Shanghai Veterinary Research Institute,  
463 Chinese Academy of Agricultural Sciences. 20 *M. fortis* voles and 20 BALB/c mice were  
464 randomly divided into 4 groups of 5 each and infected with 500±5 cercariae through  
465 the shaved abdominal skin. Schistosomula were collected from skin (2cm×2cm at  
466 infection site), lung or liver of infected animals by perfusion method and tissue culture  
467 on the 1<sup>st</sup>, 3<sup>rd</sup>, 7<sup>th</sup> and 14<sup>th</sup> days post-infection, respectively. The worm recovery rate  
468 was calculated as follows: percent of recovery = number of schistosomula /number of  
469 cercariae challenged ×100%.

470

### 471 **Histopathological assessment**

472 15 *M. fortis* voles and 15 BALB/c mice were subdivided into five groups of 3 each,  
473 and animals in the four groups were percutaneously infected with 200±2 cercariae.  
474 Animals in each group were sacrificed either before infection or on the 3<sup>rd</sup>, 7<sup>th</sup>, 10<sup>th</sup>  
475 and 14<sup>th</sup> days post-infection. Lung and liver tissues were subjected to histopathological  
476 section analysis. Preparation of paraffin sections and histological assessment were  
477 executed by Shanghai SIPPR-BK Laboratory Animal Co., Ltd. Sections were stained with  
478 hematoxylin and eosin and observed using a light microscope (Nikon, Japan).

479

### 480 **RNA sequencing**

481 *M. fortis* liver tissues were collected before infection (0d) and at 7<sup>th</sup>, 10<sup>th</sup>, 14<sup>th</sup>, 21<sup>th</sup>  
482 and 28<sup>th</sup> DPI. Mice liver tissues were collected before infection and at 7<sup>th</sup>, 10<sup>th</sup>, 14<sup>th</sup>,  
483 28<sup>th</sup> and 42<sup>th</sup> DPI. There were three biological repeats at each time point. RNA was  
484 exacted and preserved in RNeasy Lysis Buffer (Ambion) at -80°C for RNA sequencing.  
485 Additionally, RNA was isolated from multiple tissues (heart, liver, lung, and kidney)  
486 from one *M. fortis*, and the mixed RNA was sequenced to identify more transcripts.  
487 The sequencing Libraries were constructed using the standard protocols, and were  
488 sequenced using 2×150bp paired-end strategy with Illumina HiSeq X Ten platform.  
489 Adapter sequences and low-quality bases were removed or trimmed by NGS QC  
490 Toolkit (v2.3.3). To assess the quality of genome assembly, RNA-seq data from all *M.*  
491 *fortis* samples were *de novo* assembled into transcriptional fragments by Trinity  
492 (v2.1.1). We then assessed the coverage of the transcripts in the genome assembly by  
493 mapping the assembled transcriptional fragments to the genome assembly using BLAT.

494

## 495 **Transcriptome analysis**

496 RNA-Seq data of *M. fortis* and mouse were respectively mapped to the assembled  
497 draft genome and mouse genome (mm10) by RSEM algorithm (v1.2.21). Gene  
498 expression value was measured using the raw read count and the trimmed mean of  
499 M-values (TMM). Differential expression genes (DEGs) between different time points  
500 were identified by a generalized linear model (GLM) in R package edgeR (fold  
501 change>2 or <0.5, FDR<0.05). Significant temporal expression changes in times series  
502 data were identified by the regression strategy in R package maSigPro (v1.44.0).  
503 Hierarchical clustering was used to cluster genes with similar expression patterns  
504 during *S. japonicum* infection. The number of clusters was manually selected to make  
505 the smallest cluster having more than 100 genes. Functional enrichment analysis of  
506 the interested gene sets was performed by DAVID, Gene Set Enrichment Analysis, and  
507 Ingenuity Pathway Analysis (IPA). The significant functional terms satisfied FDR<0.05.  
508 Ingenuity Upstream Regulator Analysis was used to identify the cascade of upstream  
509 transcriptional regulators that can explain the observed gene expression changes. To  
510 compare *M. fortis* and mouse, we only considered orthologous genes in these two  
511 species. The comparative transcriptome analysis was done at multiple levels: the  
512 number of DEGs, the Pearson correlation coefficients between gene expression fold  
513 change, enriched functions of DEGs, and the predicted upstream regulators.

514

## 515 **Discussion**

516 *Microtus fortis* is not widely used in biomedical studies since it is distributed in  
517 particular regions. However, more and more research interests are raised to *M. fortis*  
518 due to its intrinsic resistance against *S. japonicum* infection and its potential as some  
519 disease models. To support further potential studies, we generate a draft reference  
520 genome for *M. fortis*. It will largely promote the further studies of gene functions and  
521 important traits in *M. fortis*. With decreased cost of third-generation sequencing, the  
522 reference genome can be improved to chromosome level by merging long-read  
523 sequencing and linkage mapping data.

524 The most attractive feature of *M. fortis* is the intrinsic resistance against schistosoma.  
525 There are several potential hypothesis: 1) *M. fortis* lack of genes that are necessary for  
526 the growth and development of schistosoma. 2) Compared to other species, *M. fortis*  
527 has a unique gene that prevent the development of schistosoma. 3) *M. fortis* has a  
528 special immune mechanism to prevent the development of schistosomulum.

529 After carefully investigating the sequence and evolution of *M. fortis* genes, we  
530 obtained 89 expanded and 102 contracted gene families. But the functional  
531 annotations of expanded genes and contracted genes seemed to have no direct  
532 relation with the growth and development of schistosoma. We found 532 positively  
533 selected genes (PSGs). Genes involving in innate immune progress were significantly  
534 enriched in PSGs. We also identified genes encoding immunoglobulin, T cell receptor  
535 and MHC. Their sequences will be extremely useful for further experimental studies,  
536 providing valuable resources for screening specific immune molecules against  
537 schistosoma.

538 More interestingly, comparative transcriptome analysis demonstrated that immune  
539 response was activated in *M. fortis* on the 10<sup>th</sup> days post infection. Subsequent analysis  
540 of DEGs, immunoglobulins and upstream regulators discovered several possibly  
541 processes related to the protective immunity mechanism of *M. fortis* against  
542 schistosome (Figure 6). Leukocyte and other immune cells are recruited to the liver;  
543 Activated IRF7 initiates the induction of type I interferon, leads to the activation of JAK-  
544 STAT pathway and interferon stimulated genes; Antibodies (especially IgG3) are  
545 generated against schistosoma antigens; IgG binds to Fc-gamma receptor to induce  
546 phagocytosis. These different processes might work together to prevent the normal  
547 development of schistosoma. Previous studies showed that IgG antibodies of non-  
548 susceptible host rat could kill schistosomula of *S. mansoni* *in vitro* and *in vivo* [52], and  
549 IgG3 antibody of *M. fortis* could more effectively killed schistosomula than that of  
550 mouse [18]. Further investigation the functions of *M. fortis* IgG3 is very useful for  
551 discovering vaccines to protect people against schistosoma infection. Mouse has  
552 different immune responses after *S. japonicum* infection. Previous studies revealed  
553 that the dominant immunity of mouse is Th1 response at the 3<sup>rd</sup>~5<sup>th</sup> weeks after *S.*  
554 *japonicum* infection, while Th2 response is generally to peak at the 8<sup>th</sup> weeks [24]. Our  
555 results confirmed the activation of Th1 response at 28<sup>th</sup>~42<sup>rd</sup> DPI in mouse, but Th2  
556 response was not obvious due to the lack of data after 42<sup>rd</sup> DPI. Th1 and Th2 activation  
557 pathways were also statistically significant for up-regulated genes at *M. fortis* 10<sup>th</sup> DPI,  
558 but the expression of markers genes such as IFNG, TNF, IL4, IL10 and IL13 were not  
559 detected. Taken together, distinct mechanism of immune response is the most  
560 possible reason for the intrinsic resistance of *M. fortis* against schistosoma.

561 Intrinsic resistance of *M. fortis* against *S. japonicum* infection is a complex system.  
562 Our results comprehensively illustrated the dynamic expression patterns of different  
563 hosts after schistosoma infection, but the expression of some cytokines was not  
564 observed. One possible reason is that expression of these cytokines could not be  
565 detected in liver. Additionally, we proposed potential processes to explain the  
566 protective immunity mechanism. Our results provided new insights into the intrinsic  
567 resistance of *M. fortis* against schistosoma infection. However, further experimental  
568 studies are needed to validate the real contribution of these process, and there may  
569 be other biological processes involved. In future, we plan to do functional experiments  
570 to validate our hypothesis, we also plan to study the transcriptome of peripheral blood  
571 mononuclear cell, lymph gland and spleen to further investigate the immune response  
572 of *M. fortis*.

573

## 574 **Availability of Supporting Data and Materials**

575 The *M. fortis* whole-genome project has been deposited at the DDBJ/ENA/GenBank  
576 under the accession NMRL00000000. Raw sequencing data has been submitted to the  
577 SRA (Sequence Read Archive) and NODE (National Omics Data Encyclopedia)  
578 databases. The accession numbers for DNA sequencing data are SRA:SRP111496 and  
579 NODE:OEP000443. Expression matrix of *M. fortis* and mouse have been deposited in  
580 the GEO database under accession GSE101654 and GSE101656.



581

## 582 **Competing Interests**

583 The authors declare that they have no competing interests.

584

## 585 **Authors' Contributions**

586 H.L., Z.Q.F, J.Y.X and Y.X.L designed the study. H.L. and Z.W. performed most of the  
587 computational analysis. J.Y.X., C.G., X.B. and J.F. kept a *M. fortis* colony. Z.Q.F, S.M.C.  
588 and J.J.L performed animal experiments. Q.Y.X. and B.P.M predict genes. Z.W. did  
589 evolution analysis. W.L.L aligned the genomes of multiple species. S.H did functional  
590 annotation. B.L. and W.H. provided valuable suggestions for the research plan and  
591 potential immune mechanism. Y.Y.L. and J.Y.L revised the manuscript.

592

## 593 **Acknowledgements**

594 This work was supported by the Key Project in the National Science & Technology  
595 Pillar Program from the Ministry of Science and Technology (Grant No. 2015BAI09B04),  
596 the National Natural Science Foundation of China (31872256, 31472188), National Key  
597 Research and Development Program of China (2017YFD0501306), the Chinese  
598 Academy of Sciences (KFJ-ST-S-QYZD-126, ZDBS-SSW-DQC-02), CAS  
599 Youth Innovation Promotion Association, SA-SIBS Scholarship Program.

600

## 601 **References**

- 602 1. Geneva WHO: **Global Health Estimates 2016: Deaths by Cause, Age, Sex, by Country and by**  
603 **Region, 2000-2016**. 2018.
- 604 2. Jia TW, Utzinger J, Deng Y, Yang K, Li YY, Zhu JH, King CH, Zhou XN: **Quantifying quality of life**  
605 **and disability of patients with advanced schistosomiasis japonica**. *PLoS Negl Trop Dis* 2011,  
606 5(2):e966.
- 607 3. Schistosoma japonicum Genome S, Functional Analysis C: **The Schistosoma japonicum**  
608 **genome reveals features of host-parasite interplay**. *Nature* 2009, 460(7253):345-351.
- 609 4. Han ZG, Brindley PJ, Wang SY, Chen Z: **Schistosoma genomics: new perspectives on**  
610 **schistosome biology and host-parasite interaction**. *Annual review of genomics and human*  
611 *genetics* 2009, 10:211-240.
- 612 5. Young ND, Jex AR, Li B, Liu S, Yang L, Xiong Z, Li Y, Cantacessi C, Hall RS, Xu X *et al*: **Whole-**  
613 **genome sequence of Schistosoma haematobium**. *Nature genetics* 2012, 44(2):221-225.
- 614 6. Berriman M, Haas BJ, LoVerde PT, Wilson RA, Dillon GP, Cerqueira GC, Mashiyama ST, Al-  
615 Lazikani B, Andrade LF, Ashton PD *et al*: **The genome of the blood fluke Schistosoma mansoni**.  
616 *Nature* 2009, 460(7253):352-358.
- 617 7. Wu K: **Schistosomiasis japonica among domestic and wild animals in China**. *Chin Vet J* 1957,

- 618           **3:98-100.**
- 619   8.    H.B. He JZZ, B.S. Liu: **Comparison of infection with *Schistosoma japonicum* between wild and**  
620   **laboratory bred *Microtus fortis*. *J Pract Parasitic Dis*, 1995:72-74.**
- 621   9.    He YX, Salafsky B, Ramaswamy K: **Host--parasite relationships of *Schistosoma japonicum* in**  
622   **mammalian hosts. *Trends in parasitology* 2001, 17(7):320-324.**
- 623   10.   Hao L, Yan-yan H, Bang-fa L, Jiao-jiao L, ng-jun CY, Yao-jun S, Mei-xiong W, Jin-ming L, Zhi-qiang  
624   F: **The preliminary research of *microtus fortis* superinfection *schistosoma japonicum*.**  
625   ***Chinese Journal of Veterinary Parasitology* 2001, 9(3):15-17.**
- 626   11.   Shumei C, Zhiqiang F, Jian-yu X: **Progress of *Microtus Fortis* in Research and Application of**  
627   **Medical Biology. *Laboratory Animal and Comparative Medicine* 2018, 38(1):72-77.**
- 628   12.   Yuqin Y, Jie F, Xiong B, Zhimin S, Xiongwei L, Jie G, Jianyun X, Jianhua H, Cheng G: **Establishment**  
629   **of a *Microtus fortis* model of non-alcoholic fatty liver. *Acta Laboratorium Animalis Scientia***  
630   ***Sinica* 2013, 21(2):34-38.**
- 631   13.   Jiang W, Hong Y, Peng J, Fu Z, Feng X, Liu J, Shi Y, Lin J: **Study on differences in the pathology, T**  
632   **cell subsets and gene expression in susceptible and non-susceptible hosts infected with**  
633   ***Schistosoma japonicum*. *PLoS one* 2010, 5(10):e13494.**
- 634   14.   Han H, Peng J, Han Y, Zhang M, Hong Y, Fu Z, Yang J, Tao J, Lin J: **Differential expression of**  
635   **microRNAs in the non-permissive schistosome host *Microtus fortis* under schistosome**  
636   **infection. *PLoS one* 2013, 8(12):e85080.**
- 637   15.   Gong Q, Cheng G, Qin ZQ, Xiong DH, Yu YJ, Zeng QR, Hu WX: **Identification of the resistance of**  
638   **a novel molecule heat shock protein 90alpha (HSP90alpha) in *Microtus fortis* to *Schistosoma***  
639   ***japonicum* infection. *Acta tropica* 2010, 115(3):220-226.**
- 640   16.   Cheng G, Gong Q, Gai N, Xiong DH, Yu YJ, Zeng QR, Hu WX: **Karyopherin alpha 2 (KPNA2) is**  
641   **associated with the natural resistance to *Schistosoma japonicum* infection in *Microtus fortis*.**  
642   ***Biomedicine & pharmacotherapy = Biomedecine & pharmacotherapie* 2011, 65(3):230-237.**
- 643   17.   Li R, Wu GJ, Xiong DH, Gong Q, Yu RJ, Hu WX: **A *Microtus fortis* protein, serum albumin, is a**  
644   **novel inhibitor of *Schistosoma japonicum* schistosomula. *Memorias do Instituto Oswaldo***  
645   ***Cruz* 2013, 108(7):865-872.**
- 646   18.   Jiang SF, Wei MX, Lin JJ, Pan CE, Qiu QW, He YY, Li H, Shi YJ: **Effect of IgG3 antibody purified**  
647   **from sera of *Microtus fortis* against *Schistosoma japonicum*. *Chinese journal of parasitology***  
648   ***& parasitic diseases* 2008, 26(1):34-36.**
- 649   19.   Hu Y, Sun L, Yuan Z, Xu Y, Cao J: **High throughput data analyses of the immune characteristics**  
650   **of *Microtus fortis* infected with *Schistosoma japonicum*. *Scientific reports* 2017, 7(1):11311.**
- 651   20.   Hu Y, Lu W, Shen Y, Xu Y, Yuan Z, Zhang C, Wu J, Ni Y, Liu S, Cao J: **Immune changes of**  
652   ***Schistosoma japonicum* infections in various rodent disease models. *Experimental***  
653   ***parasitology* 2012, 131(2):180-189.**
- 654   21.   Hu Y, Xu Y, Lu W, Yuan Z, Quan H, Shen Y, Cao J: **De novo assembly and transcriptome**  
655   **characterization: novel insights into the natural resistance mechanisms of *Microtus fortis***  
656   **against *Schistosoma japonicum*. *BMC genomics* 2014, 15:417.**
- 657   22.   Gang C, Wenhui Z, Jingren W, Wenbin W, Shuhong L: **Study of closed colony of *Microtus fortis***  
658   **infected with *Schistosoma japonicum*. *Chin J Schistosomiasis Control* 2013, 25:242-245.**
- 659   23.   Lefranc MP, Giudicelli V, Duroux P, Jabado-Michaloud J, Folch G, Aouinti S, Carillon E, Duvergey  
660   H, Houles A, Paysan-Lafosse T *et al*: **IMGT(R), the international ImMunoGeneTics information**  
661   **system(R) 25 years on. *Nucleic acids research* 2015, 43(Database issue):D413-422.**

- 662 24. Pearce EJ, MacDonald AS: **The immunobiology of schistosomiasis.** *Nature reviews*  
663 *Immunology* 2002, **2**(7):499-511.
- 664 25. Honda K, Takaoka A, Taniguchi T: **Type I interferon [corrected] gene induction by the**  
665 **interferon regulatory factor family of transcription factors.** *Immunity* 2006, **25**(3):349-360.
- 666 26. Liu SY, Sanchez DJ, Aliyari R, Lu S, Cheng G: **Systematic identification of type I and type II**  
667 **interferon-induced antiviral factors.** *Proceedings of the National Academy of Sciences of the*  
668 *United States of America* 2012, **109**(11):4239-4244.
- 669 27. Schoggins JW, Rice CM: **Interferon-stimulated genes and their antiviral effector functions.**  
670 *Curr Opin Virol* 2011, **1**(6):519-525.
- 671 28. Carter ME, Brunet A: **FOXO transcription factors.** *Current biology : CB* 2007, **17**(4):R113-114.
- 672 29. Hedrick SM, Hess Michelini R, Doedens AL, Goldrath AW, Stone EL: **FOXO transcription factors**  
673 **throughout T cell biology.** *Nature reviews Immunology* 2012, **12**(9):649-661.
- 674 30. Schmidt M, Fernandez de Mattos S, van der Horst A, Klompmaker R, Kops GJ, Lam EW,  
675 Burgering BM, Medema RH: **Cell cycle inhibition by FoxO forkhead transcription factors**  
676 **involves downregulation of cyclin D.** *Molecular and cellular biology* 2002, **22**(22):7842-7852.
- 677 31. Jackson ER, Johnson D, Nash WG: **Gene networks in development.** *J Theor Biol* 1986,  
678 **119**(4):379-396.
- 679 32. Wang Y, Holmes E, Nicholson JK, Cloarec O, Chollet J, Tanner M, Singer BH, Utzinger J:  
680 **Metabonomic investigations in mice infected with Schistosoma mansoni: an approach for**  
681 **biomarker identification.** *Proceedings of the National Academy of Sciences of the United States*  
682 *of America* 2004, **101**(34):12676-12681.
- 683 33. Xiong B, jinxing L, Xiaodong W, Jie F, Jie G, Jianyun. X: **Characterization of Growth and**  
684 **Reproductive Performance in Microtus Fortis.** *Laboratory Animal and Comparative Medicine*  
685 2018, **38**(2):135-140.
- 686 34. Xiong B, Zhenghong X, Zhimin S, Xiongwei L, Xinqiao H: **Artificial breeding of Microtus Fortis,**  
687 **Laboratory Animal and Comparative Medicine.** 2006, **26**(4):242-244.
- 688 35. Xiong B, jinxing L, Xiaodong W, Xie Jianyun, Zhenghong X, Cheng G, Jianhua H: **The Biological**  
689 **purification method of Microtus Fortis population.** *Laboratory Animal and Comparative*  
690 *Medicine* 2011, **31**(3):215-217.
- 691 36. Smit A, Hubley, R & Green, P. : **RepeatMasker Open-4.0.** 2013-2015,  
692 <http://www.repeatmasker.org>.
- 693 37. Smit A, Hubley, R.: **RepeatModeler Open-1.0.** 2008-2015, <http://www.repeatmasker.org>.
- 694 38. Bao W, Kojima KK, Kohany O: **Repbase Update, a database of repetitive elements in**  
695 **eukaryotic genomes.** *Mobile DNA* 2015, **6**:11.
- 696 39. She R, Chu JS, Wang K, Pei J, Chen N: **GenBlastA: enabling BLAST to identify homologous gene**  
697 **sequences.** *Genome research* 2009, **19**(1):143-149.
- 698 40. Birney E, Clamp M, Durbin R: **GeneWise and Genomewise.** *Genome research* 2004, **14**(5):988-  
699 995.
- 700 41. Zhang Z, Carriero N, Zheng D, Karro J, Harrison PM, Gerstein M: **PseudoPipe: an automated**  
701 **pseudogene identification pipeline.** *Bioinformatics* 2006, **22**(12):1437-1439.
- 702 42. Li H, Coghlan A, Ruan J, Coin LJ, Heriche JK, Osmotherly L, Li R, Liu T, Zhang Z, Bolund L *et al*:  
703 **TreeFam: a curated database of phylogenetic trees of animal gene families.** *Nucleic acids*  
704 *research* 2006, **34**(Database issue):D572-580.
- 705 43. Li R, Fan W, Tian G, Zhu H, He L, Cai J, Huang Q, Cai Q, Li B, Bai Y *et al*: **The sequence and de**

- 706 **novo assembly of the giant panda genome.** *Nature* 2010, **463**(7279):311-317.
- 707 44. Sievers F, Wilm A, Dineen D, Gibson TJ, Karplus K, Li W, Lopez R, McWilliam H, Remmert M,  
708 Soding J *et al*: **Fast, scalable generation of high-quality protein multiple sequence alignments**  
709 **using Clustal Omega.** *Molecular systems biology* 2011, **7**:539.
- 710 45. Kumar S, Stecher G, Tamura K: **MEGA7: Molecular Evolutionary Genetics Analysis Version 7.0**  
711 **for Bigger Datasets.** *Molecular biology and evolution* 2016, **33**(7):1870-1874.
- 712 46. Yang Z: **PAML 4: phylogenetic analysis by maximum likelihood.** *Molecular biology and*  
713 *evolution* 2007, **24**(8):1586-1591.
- 714 47. Hedges SB, Dudley J, Kumar S: **TimeTree: a public knowledge-base of divergence times among**  
715 **organisms.** *Bioinformatics* 2006, **22**(23):2971-2972.
- 716 48. Han MV, Thomas GW, Lugo-Martinez J, Hahn MW: **Estimating gene gain and loss rates in the**  
717 **presence of error in genome assembly and annotation using CAFE 3.** *Molecular biology and*  
718 *evolution* 2013, **30**(8):1987-1997.
- 719 49. Castresana J: **Selection of conserved blocks from multiple alignments for their use in**  
720 **phylogenetic analysis.** *Molecular biology and evolution* 2000, **17**(4):540-552.
- 721 50. Slater GS, Birney E: **Automated generation of heuristics for biological sequence comparison.**  
722 *BMC bioinformatics* 2005, **6**:31.
- 723 51. Ye J, Ma N, Madden TL, Ostell JM: **IgBLAST: an immunoglobulin variable domain sequence**  
724 **analysis tool.** *Nucleic acids research* 2013, **41**(Web Server issue):W34-40.
- 725 52. Horta MF, Ramalho-Pinto FJ: **Subclasses of rat IgG active in the killing of schistosomula of**  
726 **Schistosoma mansoni in vitro and in vivo.** *Journal of immunology* 1984, **133**(6):3326-3332.
- 727

## 728 Tables

729 **Table 1.** Global statistics of the *M. fortis* genome.

| <b>Sequencing</b> | <b>Insert size</b> | <b>Total data (Gb)</b>   | <b>Sequence coverage (x)</b>    |
|-------------------|--------------------|--------------------------|---------------------------------|
| Libraries         | 250, 500 bp        | 167.37                   | 70.0                            |
|                   | 2, 5, 10, 20 kb    | 97.53                    | 40.8                            |
| <b>Assembly</b>   | <b>N50 (kb)</b>    | <b>Number</b>            | <b>Size (Gb)</b>                |
| Contigs           | 60.7               | 9,910                    | 2.1                             |
| Scaffolds         | 10,158             | 64                       | 2.2                             |
| <b>Annotation</b> | <b>Number</b>      | <b>Total length (Mb)</b> | <b>Percentage of genome (%)</b> |
| GC content        | /                  | 932.58                   | 42.4                            |
| Repeats           | /                  | 666.41                   | 30.2                            |
| Genes             | 21,867             | 459.89                   | 20.9                            |
| CDS               | 21,867             | 30.96                    | 1.4                             |

730

## 731 Figures

732 **Figure1.** Phenotype of *M. fortis* and mouse after *S. japonicum* infection. A) Recovery  
733 rate of schistosoma from *S. japonicum*-infected *M. fortis*. B) Recovery rate of  
734 schistosoma from *S. japonicum*-infected mice. Schistosomula was obtained from skin,  
735 lung and liver of *M. fortis* and mice respectively. C) Histopathology of lung sections

736 with HE staining. D) Histopathology of liver sections with HE staining. The up and down  
737 panels are the tissues prepared from *M. fortis* and mice before infection (0d) and on  
738 the 3<sup>rd</sup>, 7<sup>th</sup>, 10<sup>th</sup> and 14<sup>th</sup> days after *S.japonicum* infection (×200). Blue arrow stands for  
739 inflammatory cell infiltration, brown arrow stands for pulmonary hemorrhage, black  
740 arrow stands for liver cell vacuolation, green arrow stands for parasite, and yellow  
741 arrow stands for hepatocyte necro.

742

743 **Figure2.** Analysis of *M. fortis* genome. A) A Venn diagram shows the unique and shared  
744 orthologous gene families in human, mouse, *M. fortis* and *M. ochrogaster*. B)  
745 Phylogeny tree and evolution of gene families. The numbers indicate the number of  
746 gene families that have expanded (orange) or contracted (blue) since the split from a  
747 common ancestor. C) dN/dS ratio of the positively selected genes. Three axes are the  
748 percentage of sites with dN/dS>1, dN/dS=1 and dN/dS<1, respectively. Genes involved  
749 in innate immune response (GO:0045087) are shown in red.

750

751 **Figure3.** Comparative transcriptome analysis between *M. fortis* liver and mouse liver  
752 after *S. japonicum* infection. A) Time-series transcriptome of *M. fortis* liver before  
753 infection (0d) and on the 7<sup>th</sup>, 10<sup>th</sup>, 14<sup>th</sup>, 21<sup>st</sup> and 28<sup>th</sup> DPI. Rows were DEGs that were  
754 differentially expressed between pre-infection and post-infection (FDR<0.05).  
755 Hierarchical clustering was used to classify the DEGs into clusters (The smallest cluster  
756 has more than 100 genes). B) Time-series transcriptome of mouse liver before  
757 infection (0d) and on the 7<sup>th</sup>, 10<sup>th</sup>, 14<sup>th</sup>, 28<sup>th</sup> and 42<sup>nd</sup> DPI. C) Correlation of gene  
758 expression changes. Expression fold changes of orthologous genes were calculated by  
759 comparing pre-infection (0d) and post-infection. Pearson correlation coefficients were  
760 calculated to measure the similarity of fold change between *M. fortis* and mouse. D)  
761 Comparison of the DEGs of *M. fortis* “0d Vs. 10d” with the DEGs of mouse “0d Vs. 10d”,  
762 and mouse “0d Vs. 28d”. E) Significantly enriched GO Biological Progress terms  
763 (FDR<0.05). The colors represent scores of Gene Set Enrichment Analysis. Positive  
764 (Negative) ES means gene expressions are up-regulated (down-regulated) after  
765 infection. GO terms in the red box were immune related biological process.

766

767 **Figure4.** Mechanism of immune response in *M. fortis* against schistosoma infection. A)  
768 Enriched pathways of 395 genes that were up-regulated in *M. fortis* and unchanged in  
769 mouse. B), C) Expression profiles of ICAM1 and FCGR1. The expression value is given  
770 by log<sub>2</sub>(TMM), which were obtained from RNA sequencing. D) Expression change of  
771 immunoglobulin isotypes. E) Expression profiles of IgG3. F) Predicted regulators of *M.*  
772 *fortis* and mice on the 10<sup>th</sup> days post-infection. Upstream regulators of the DEGs were  
773 identified by Ingenuity Upstream Regulator Analysis. Here we only showed regulators  
774 whose expression significantly changed in *M. fortis* or mouse, and the direction of  
775 expression change were not consistent between two species. Red and green circles  
776 indicate regulators that are specific for *M. fortis* and mouse, respectively. Blue circles  
777 represent the common regulators whose expression changes are opposite in *M. fortis*  
778 and mouse. G) Expression profiles of IRF7. H) Expression change of interferon  
779 simulated genes. Red and green points indicate significant up-regulation or down-



780 regulation, respectively.

781

782 **Figure5.** Transcriptome characteristics of mouse infected by schistosome infection. A)  
783 Expression profiles of IFNG and INF in mouse. B) Expression profiles of FOXO1 in *M.*  
784 *fortis* and mouse. C) Expression change of key genes involved in cell cycle. D), E)  
785 Expression profiles of FASN and ACACA.

786

787 **Figure6.** Potential immune processes related with the intrinsic resistance of *M. fortis*.

788

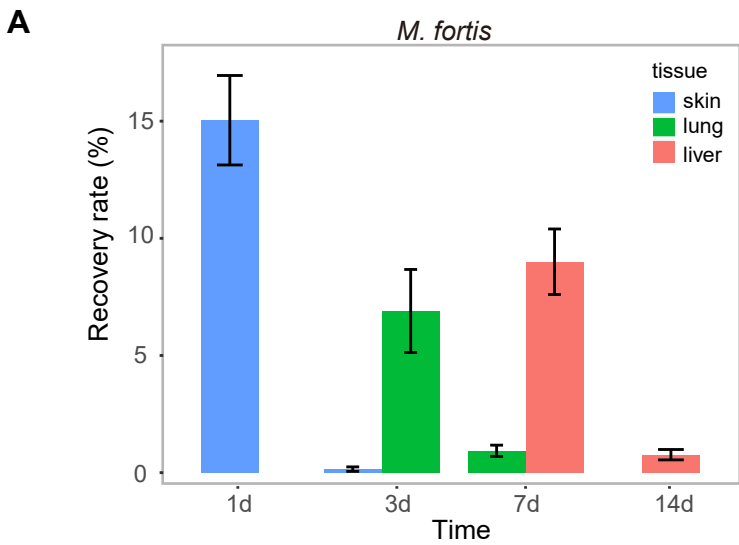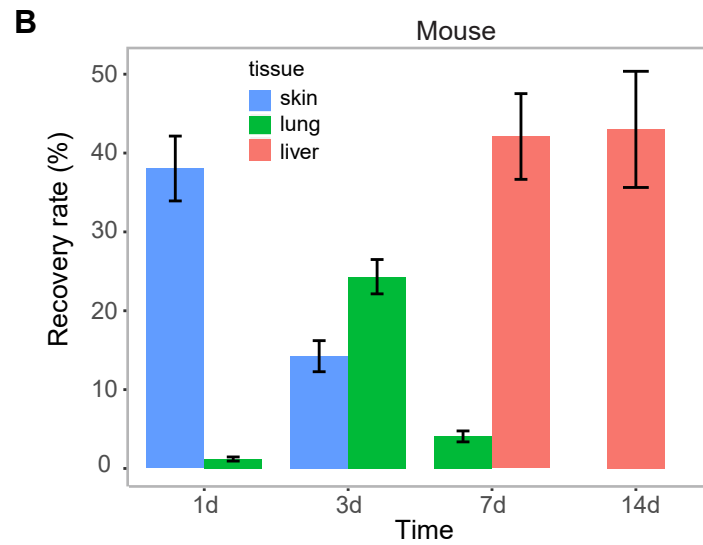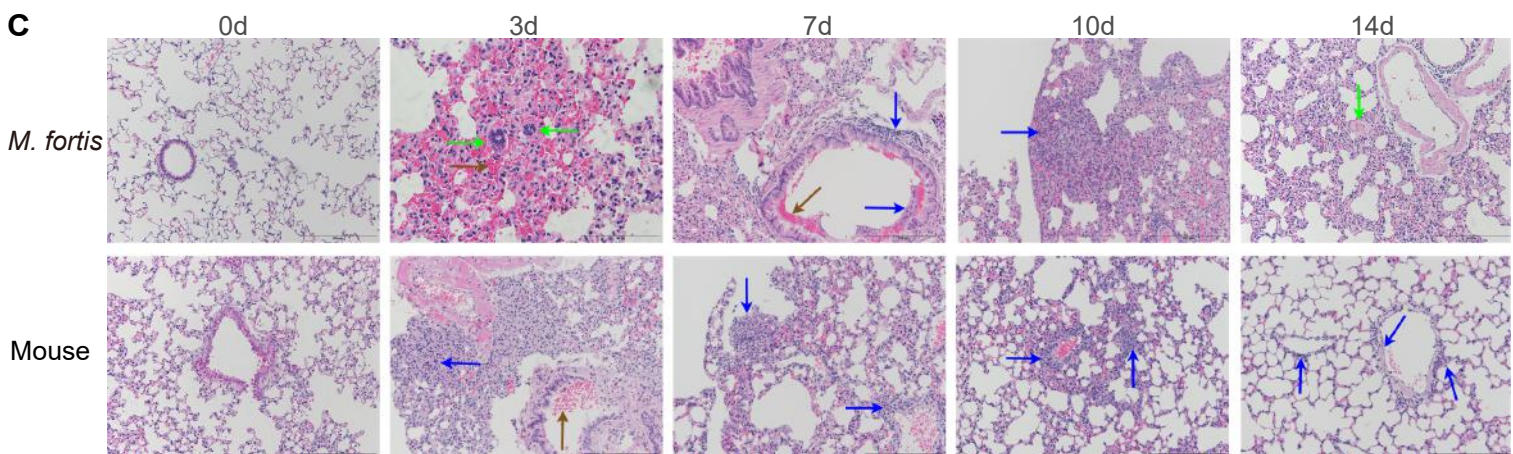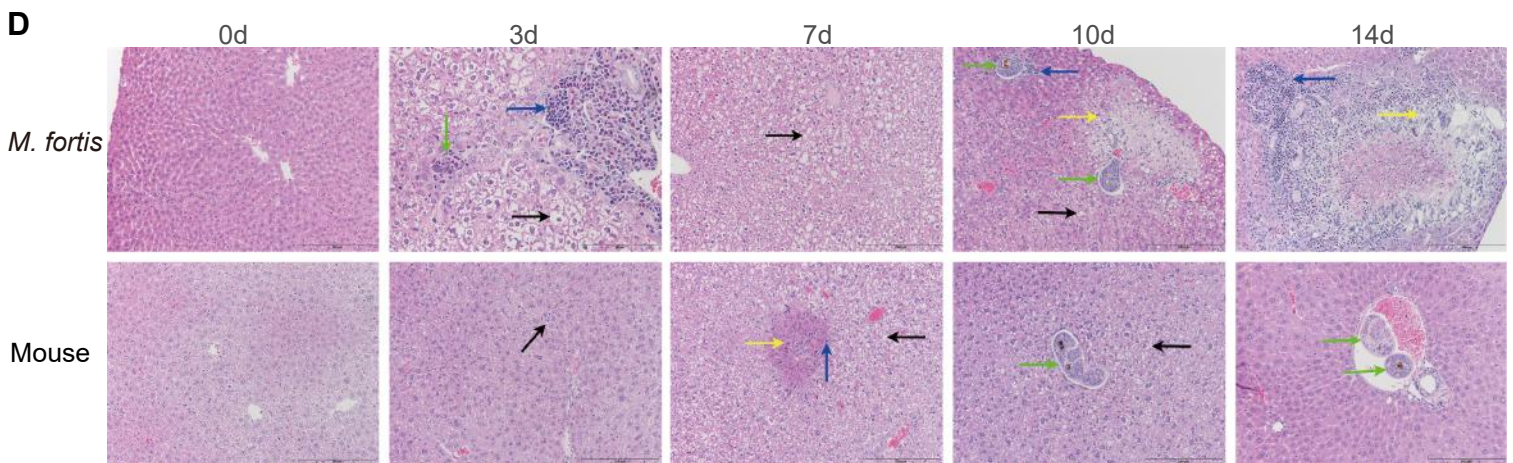

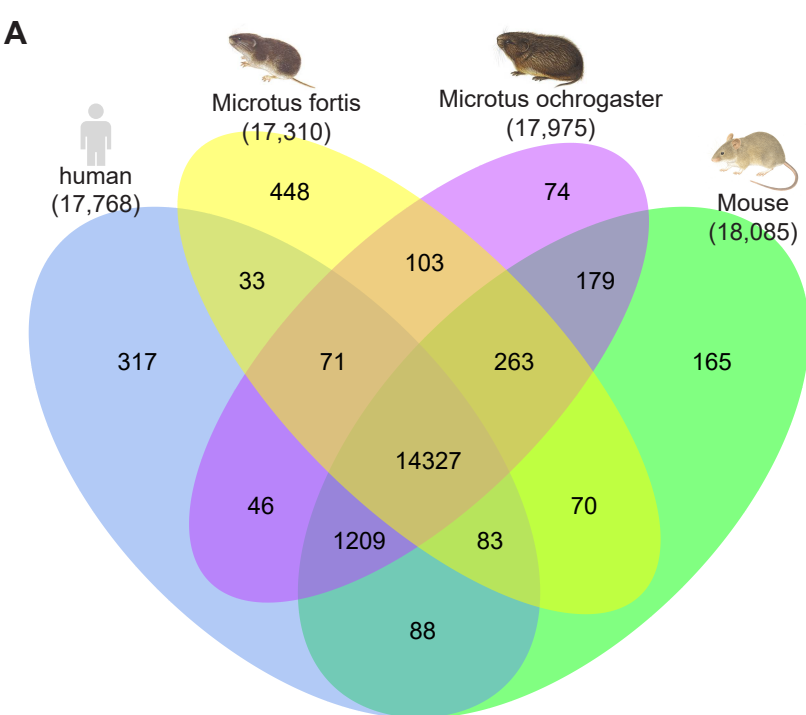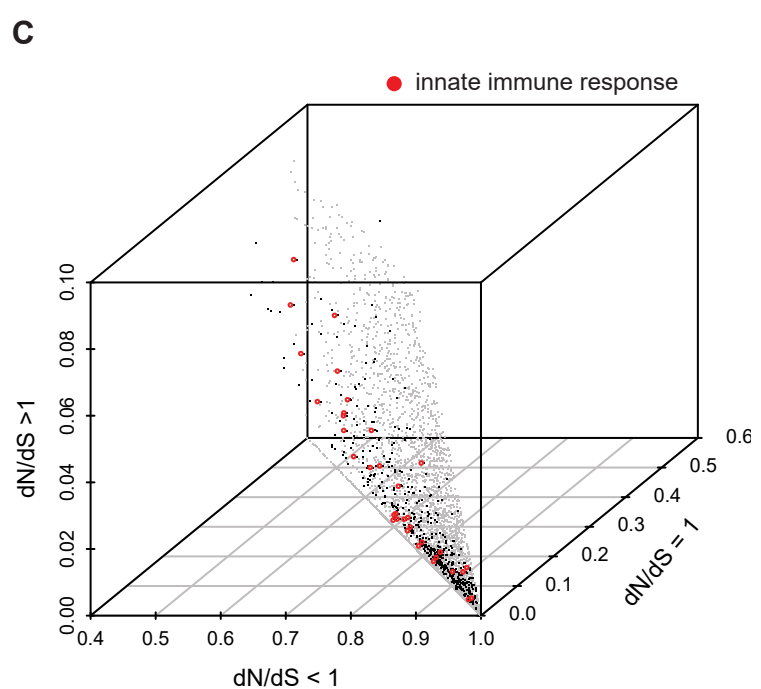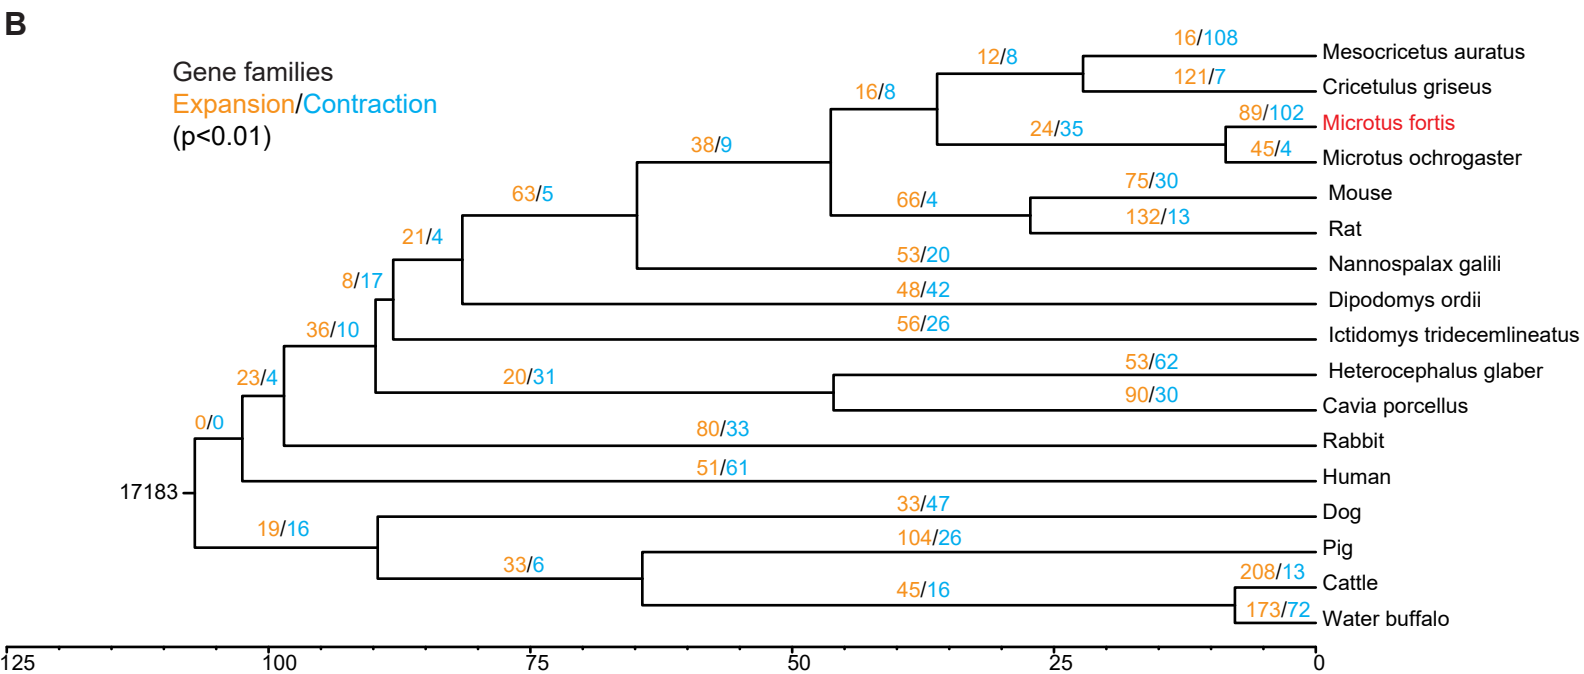

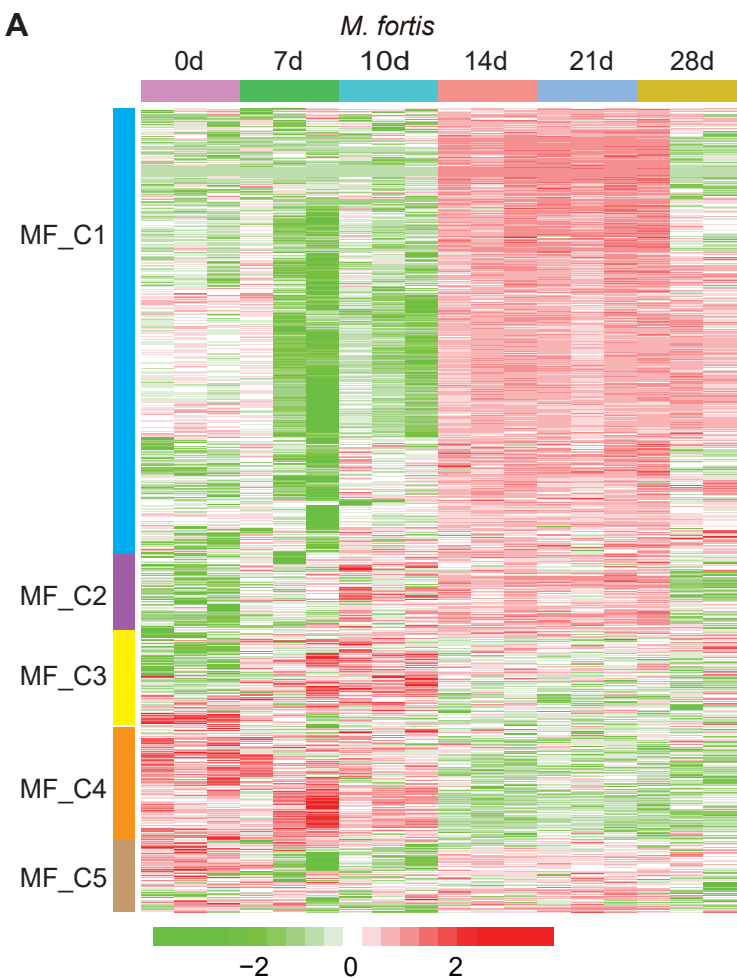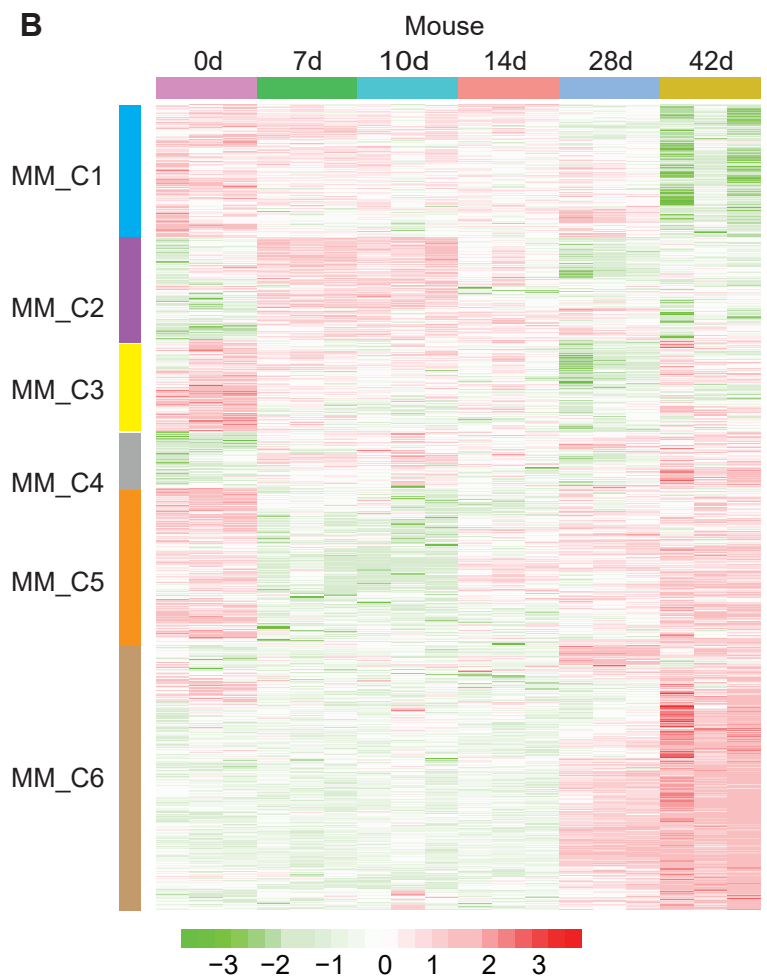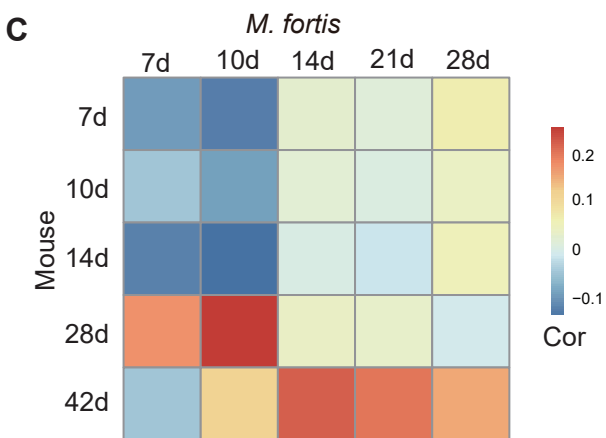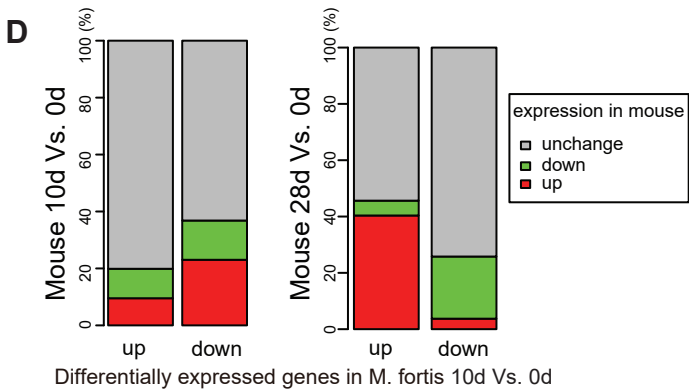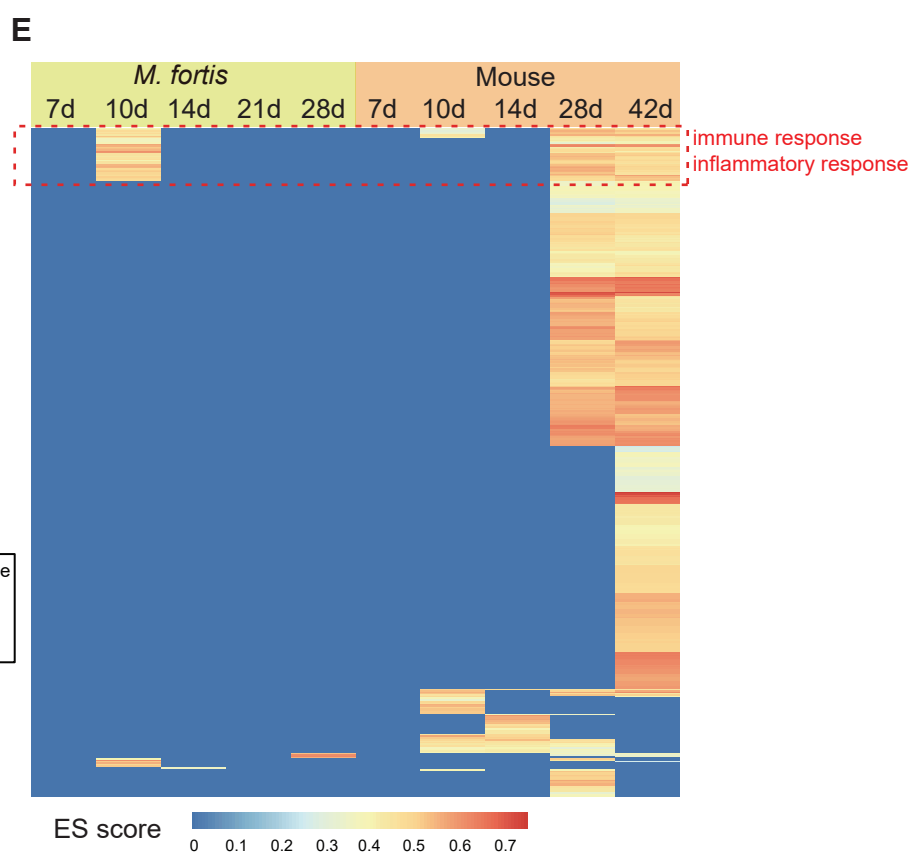

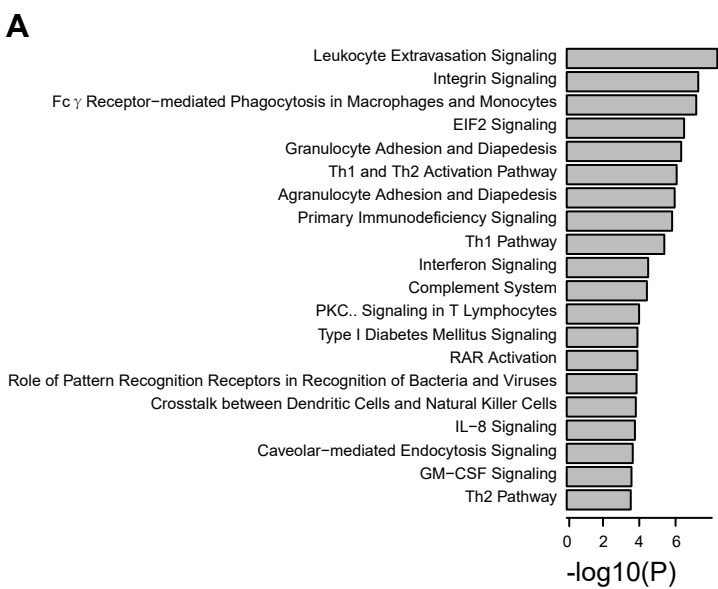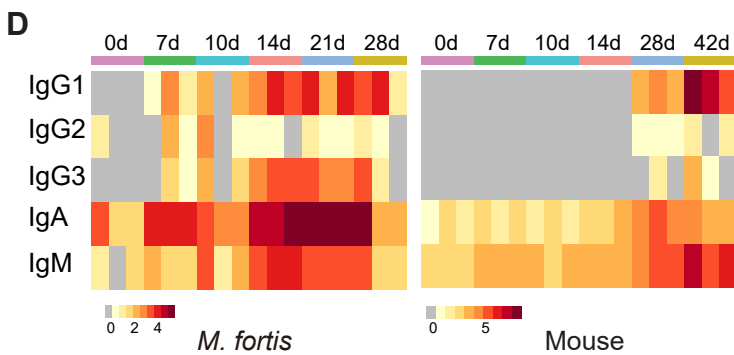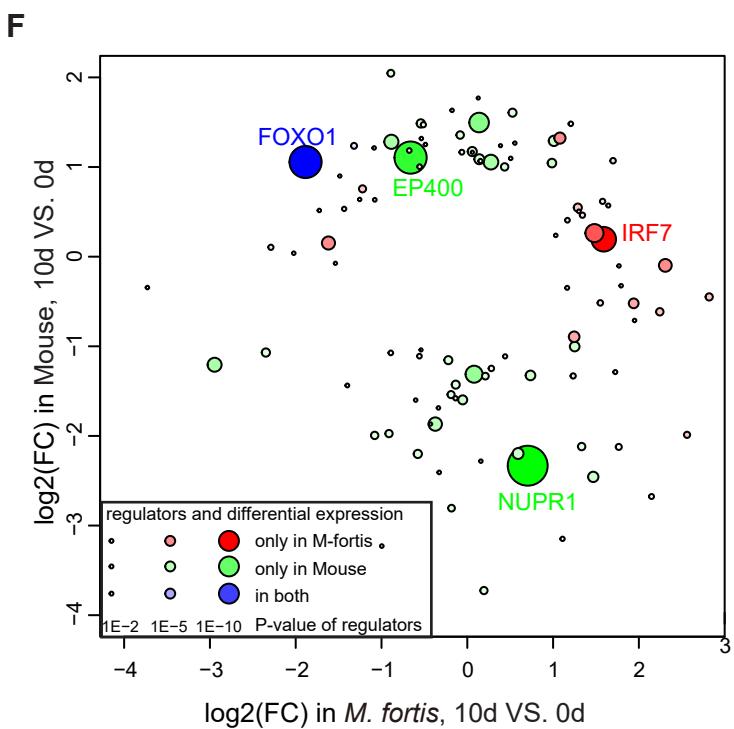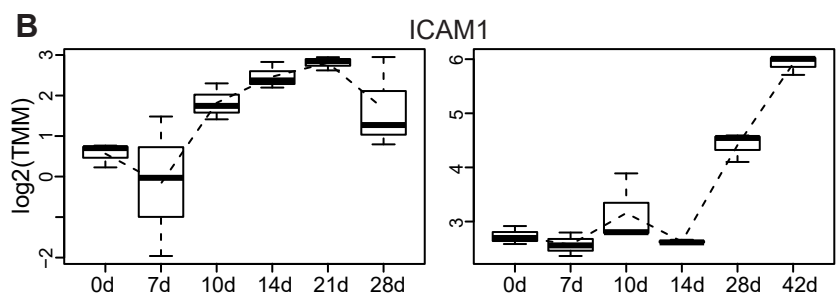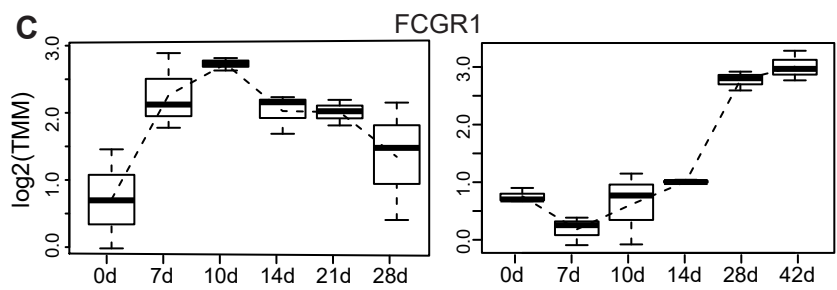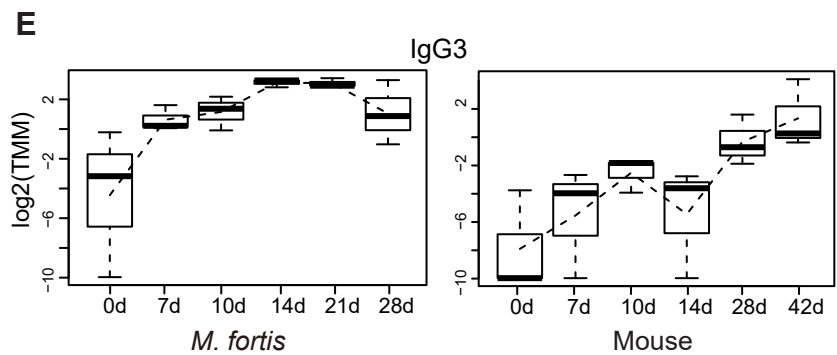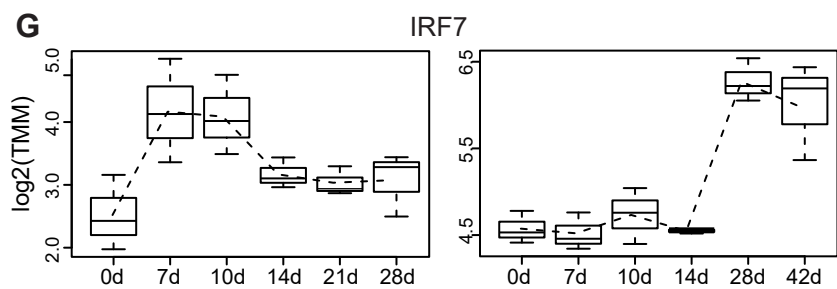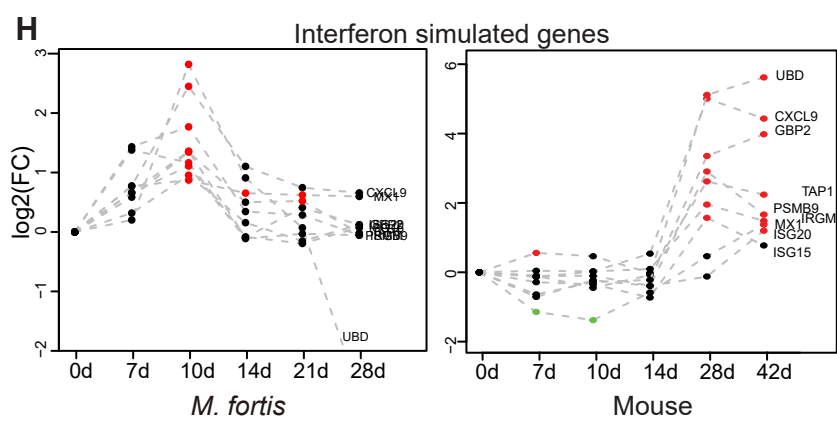



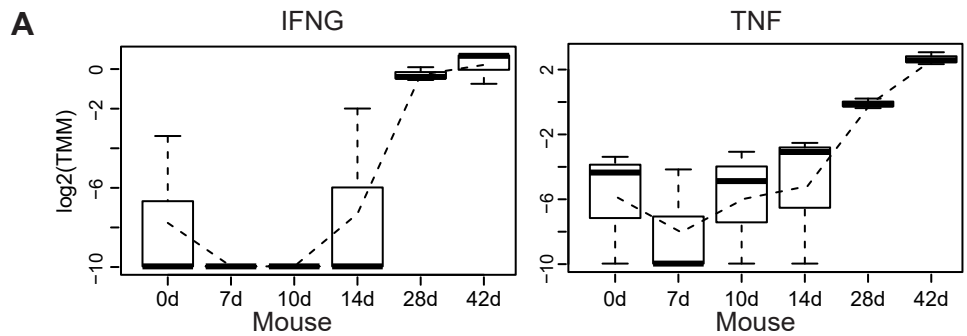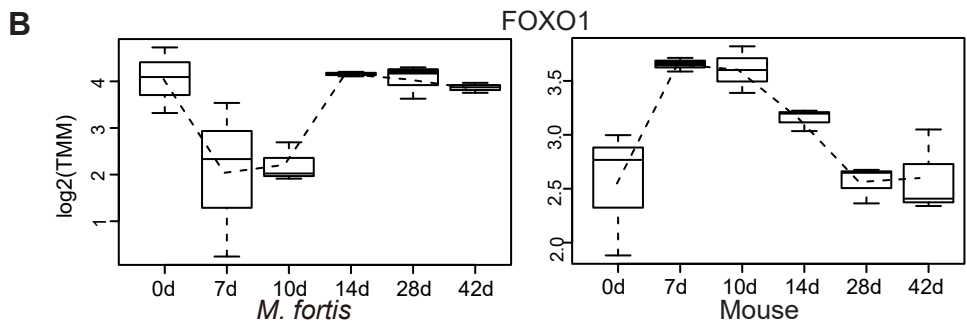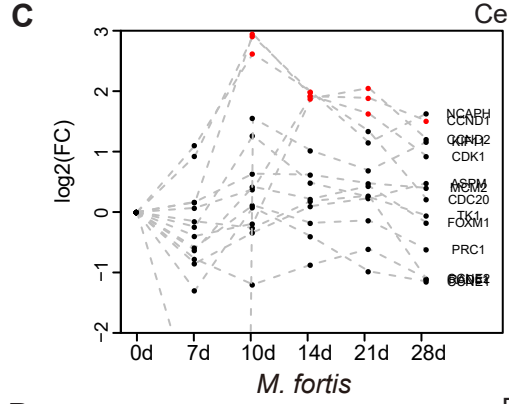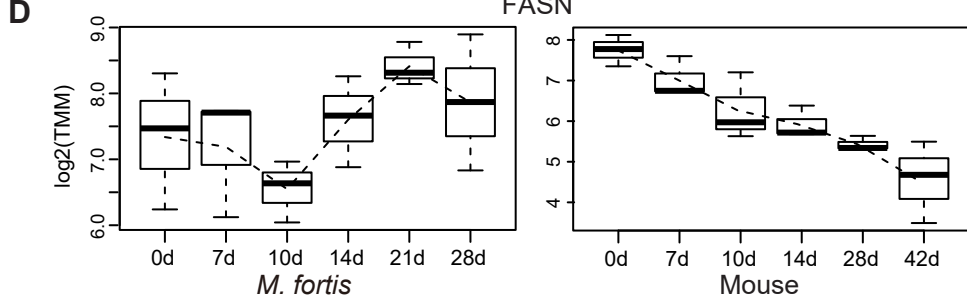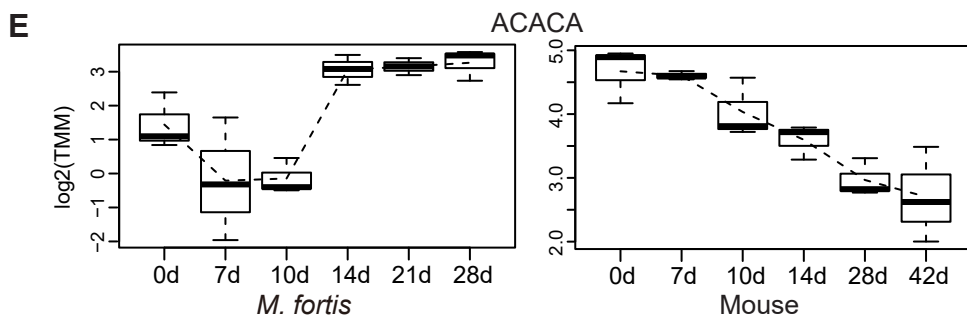

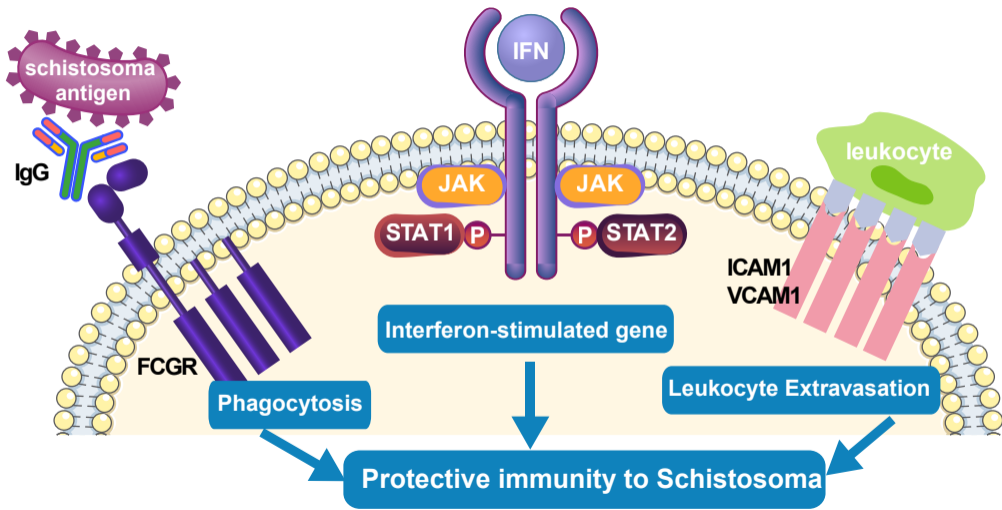

Source: https://www.biorxiv.org/content/10.1101/2020.09.03.282319v1.full.pdf
